# Supplementary material
Source: publisher site journal article supplement (https://www.dovepress.com/article/523029)
Supplement: Supplementary file 1 [file 523029%20Revised%20Supplementary%20Material.docx]

# Supplementary Material

**Supplementary Material 1：Model Details**

**Supplementary Table 1: Baseline Characteristics of ACS Patients Who Underwent PCI in Training and Validation Sets**

**Supplementary Table 2: RCS Curve Knots for Features Selected by Boruta in ACS Patients Who Underwent PCI**

**Supplementary Table 3 Brier Scores of Machine Learning Models for Depression Risk Prediction in ACS Patients**

**Supplementary Figure 1: Correlation Matrix of All Clinical Features**

**Supplementary Figure 2: Variation of Feature Importance Across 300 Boruta Iterations**

**Supplementary Figure 3: Performance Metrics Heatmap for Six Models**

**Supplementary Figure 4: SHAP Dependence Plots for LGBM and XGBoost Models**

# Supplementary Material 1: Model Details

# XGBoost Model Details

**Objective**: Binary logistic regression ("binary:logistic")

**Number of Trees (nrounds)**: 1,000 (early stopped at 222 iterations; best iteration at 22)

**Early Stopping**: Stopped when test_logloss did not improve for 200 rounds; best test_logloss at iteration 22 (0.429075)

**Hyperparameters**:

eta (learning rate): 0.3

gamma: 0.001

max_depth: 2

subsample: 0.7

colsample_bytree: 0.4

booster: "gbtree"

seed: 1234

**Performance Metrics**:

Training logloss at best iteration: 0.412532

Test logloss at best iteration: 0.429075

**Feature Importance (Top 10 features)**:

TSH: Gain 0.16795556, Cover 0.15685068, Frequency 0.15692308

WBC: Gain 0.14908449, Cover 0.15149084, Frequency 0.14615385

total_cholesterol: Gain 0.13208367, Cover 0.14619785, Frequency 0.14615385

LDL_C: Gain 0.12224242, Cover 0.11305041, Frequency 0.12461538

uric_acid: Gain 0.12096574, Cover 0.12820062, Frequency 0.13230769

TyG: Gain 0.11695861, Cover 0.13167724, Frequency 0.13230769

LVEF: Gain 0.08063407, Cover 0.08823915, Frequency 0.09230769

NYHA: Gain 0.04746856, Cover 0.03828085, Frequency 0.03384615

diabetes: Gain 0.03489044, Cover 0.02649891, Frequency 0.02153846

sleep_disorder: Gain 0.02771644, Cover 0.01951346, Frequency 0.01384615

**Dataset**: 10 features, fitted to training set (n=1,366) and validated on test set (n=586)

### LightGBM Model Details

**Objective**: Binary;

**Number of Trees**: 1,000;

**Hyperparameters**: similar structure to XGBoost (specific parameters not logged due to software constraints)

**Dataset**: Fitted to dataset with 10 columns (same 1,366 training, 586 validation split).

### Logistic Regression (LR) Model Details

**Objective**: Binary logistic regression (binomial logit)

**Coefficients**:

Intercept: -4.55539

NYHA: 0.526695

WBC: 0.062534

TyG: 0.357290

uric_acid: 0.779954

sleep_disorder: 0.126601

LDL_C: -0.087389

TSH: -0.083013

diabetes: 0.830232

LVEF: -0.083013

total_cholesterol: -0.086388

**Performance Metrics**:

AIC: 1272

Residual Deviance: 1250

Null Deviance: 1391

**Dataset**: 10 features, fitted to training set (n=1,366) and validated on test set (n=586)

**Note**: No additional hyperparameter tuning beyond the binomial logit model.

| Index | VIF |
| --- | --- |
| NYHA | 1.021110072319197 |
| WBC | 1.014746997156428 |
| TyG | 1.389350597653273 |
| Uric acid | 1.0322118027873 |
| Sleep disorder | 1.075506697271226 |
| LDL-C | 5.805055869640162 |
| TSH | 1.006857469542531 |
| Diabetes | 1.021849652292277 |
| LVEF | 1.021872367414988 |
| Total cholesterol | 6.415493208716293 |

### Support Vector Machine (SVM) Model Details

**Objective**: Binary classification

**Hyperparameters**:

Kernel: Linear

Cost: 1

**Performance Metrics**:

Number of Support Vectors: 652

**Dataset**: 10 features, fitted to training set (n=1,366) and validated on test set (n=586)

### Decision Tree (DT) and Naive Bayes (NB) Model Details

Parameters for DT and NB were not logged due to software constraints. These models were included in the analysis, but specific hyperparameters and performance metrics are unavailable and will be addressed in future analyses.

# Supplementary Table 1 **Baseline Characteristics of ACS Patients Who Underwent PCI in Training and Validation Sets**

| Characteristic | Overall  (n=1951) | Training Set  (n=1365) | Validation Set  (n=586) | *P* |
| --- | --- | --- | --- | --- |
|
| Age(years) | 63.00(54.00,72.00) | 63.00(54.00,72.00) | 64.00(55.00,73.00) | 0.157 |
| Sex,n(%) |  |  |  | 0.135 |
| Male | 1247(63.92) | 887(64.98) | 360(61.43) |  |
| Female | 704(36.08) | 478(35.02) | 226(38.57) |  |
| DBP(mmHg) | 77.00(68.00,85.00) | 77.00(69.00,85.00) | 76.00(68.00,85.00) | 0.229 |
| SBP(mmHg) | 126.00(112.00,142.00) | 126.00(113.00,142.00) | 125.00(110.25,140.00) | 0.353 |
| HR(bpm) | 78.00(71.00,90.00) | 78.00(71.00,89.00) | 78.50(72.00,90.00) | 0.132 |
| Depression,n(%) |  |  |  | 0.067 |
| NO | 1569(80.42) | 1083(79.34) | 486(82.94) |  |
| YES | 382(19.58) | 282(20.66) | 100(17.06) |  |
| History of PCI,n(%) |  |  |  | 0.755 |
| NO | 1553(79.60) | 1084(79.41) | 469(80.03) |  |
| YES | 398(20.40) | 281(20.59) | 117(19.97) |  |
| Multivessel Disease,n(%) |  |  |  | 0.180 |
| NO | 1532(78.52) | 1083(79.34) | 449(76.62) |  |
| YES | 419(21.48) | 282(20.66) | 137(23.38) |  |
| Post PCI Angina,n(%) |  |  |  | 0.208 |
| NO | 1724(88.36) | 1198(87.77) | 526(89.76) |  |
| YES | 227(11.64) | 167(12.23) | 60(10.24) |  |
| NYHA,n(%) |  |  |  | 0.396 |
| 1 | 476(24.40) | 330(24.18) | 146(24.91) |  |
| 2 | 802(41.11) | 570(41.76) | 232(39.59) |  |
| 3 | 537(27.52) | 364(26.67) | 173(29.52) |  |
| 4 | 136(6.97) | 101(7.40) | 35(5.97) |  |
| Ethnicity,n(%) |  |  |  | 0.791 |
| Han Chinese | 998(51.15) | 705(51.65) | 293(50.00) |  |
| Uyghur | 693(35.52) | 479(35.09) | 214(36.52) |  |
| Other | 260(13.33) | 181(13.26) | 79(13.48) |  |
| Smoking,n(%) |  |  |  | 0.381 |
| NO | 1173(60.12) | 812(59.49) | 361(61.60) |  |
| YES | 778(39.88) | 553(40.51) | 225(38.40) |  |
| Diabetes,n(%) |  |  |  | 0.671 |
| NO | 1218(62.43) | 848(62.12) | 370(63.14) |  |
| YES | 733(37.57) | 517(37.88) | 216(36.86) |  |
| Stroke,n(%) |  |  |  | 0.784 |
| NO | 1620(83.03) | 1136(83.22) | 484(82.59) |  |
| YES | 331(16.97) | 229(16.78) | 102(17.41) |  |
| Hypertension,n(%) |  |  |  | 0.285 |
| NO | 688(35.26) | 471(34.51) | 217(37.03) |  |
| YES | 1263(64.74) | 894(65.49) | 369(62.97) |  |
| Appetite disturbance,n(%) |  |  |  | 0.505 |
| NO | 1506(77.19) | 1048(76.78) | 458(78.16) |  |
| YES | 445(22.81) | 317(23.22) | 128(21.84) |  |
| Sleep disorder,n(%) |  |  |  | 0.284 |
| NO | 1328(68.07) | 919(67.33) | 409(69.80) |  |
| YES | 623(31.93) | 446(32.67) | 177(30.20) |  |
| BMI,n(%) |  |  |  | 0.327 |
| ＜25 | 783(40.13) | 551(40.37) | 232(39.59) |  |
| ≥25-＜30 | 968(49.62) | 666(48.79) | 302(51.54) |  |
| ≥30 | 200(10.25) | 148(10.84) | 52(8.87) |  |
| WBC(×10⁹/L) | 7.03(5.76,8.68) | 7.03(5.78,8.65) | 7.04(5.72,8.83) | 0.992 |
| Hb(g/L) | 133.00(117.00,146.00) | 133.00(116.00,147.00) | 134.00(117.00,145.00) | 0.494 |
| PLT(×10⁹/L) | 231.00(213.00,252.00) | 231.00(214.00,252.00) | 231.50(212.00,252.00) | 0.658 |
| ALT(U/L) | 21.80(14.50,35.32) | 22.00(14.70,35.40) | 21.29(14.00,35.18) | 0.477 |
| AST(U/L) | 22.73(17.39,33.12) | 23.10(17.62,33.14) | 21.92(16.90,33.05) | 0.230 |
| Albumin(g/L) | 38.10(34.50,41.41) | 38.00(34.50,41.30) | 38.40(34.50,41.60) | 0.393 |
| FBG(mg/dL) | 109.38(86.14,151.73) | 109.74(86.32,149.57) | 109.02(85.59,155.11) | 0.888 |
| Triglycerides(mg/dL) | 139.94(107.17,162.08) | 139.94(107.17,162.08) | 139.50(106.51,162.08) | 0.690 |
| TyG | 8.95(8.63,9.39) | 8.95(8.63,9.39) | 8.97(8.61,9.43) | 0.911 |
| Creatinine(μmol/L) | 78.00(64.12,99.64) | 77.94(64.04,99.14) | 79.00(64.42,99.99) | 0.603 |
| Uric acid(μmol/L) | 347.80(277.00,438.97) | 348.00(276.00,442.00) | 345.30(280.19,434.15) | 0.629 |
| Total cholesterol(mmol/L) | 3.67(3.04,4.49) | 3.67(3.06,4.46) | 3.66(3.00,4.54) | 0.965 |
| HDL-C(mmol/L) | 0.90(0.74,1.12) | 0.90(0.75,1.12) | 0.90(0.73,1.11) | 0.402 |
| LDL-C(mmol/L) | 2.35(1.78,2.96) | 2.34(1.80,2.92) | 2.37(1.74,3.05) | 0.925 |
| TSH(mIU/L) | 2.10(1.23,3.50) | 2.08(1.20,3.48) | 2.12(1.28,3.60) | 0.711 |
| TT3(nmol/L) | 1.40(1.10,1.66) | 1.39(1.09,1.66) | 1.42(1.13,1.67) | 0.310 |
| TT4(nmol/L) | 85.41(65.54,101.80) | 86.08(65.94,102.60) | 84.38(64.33,100.00) | 0.224 |
| LVEF(%) | 61.90(57.33,63.69) | 61.90(57.11,63.69) | 61.90(57.88,63.69) | 0.551 |
| Aspirin,n(%) |  |  |  | 0.588 |
| NO | 497(25.47) | 353(25.86) | 170(24.57) |  |
| YES | 1454(74.53) | 1012(74.14) | 416(75.43) |  |
| Clopidogrel,n(%) |  |  |  | 0.427 |
| NO | 1169(59.92) | 810(59.34) | 359(61.26) |  |
| YES | 782(40.08) | 555(40.66) | 227(38.74) |  |
| Ticagrelor,n(%) |  |  |  | 0.587 |
| NO | 1550(79.45) | 1080(79.12) | 470(80.20) |  |
| YES | 401(20.55) | 285(20.88) | 116(19.80) |  |
| Statin,n(%) |  |  |  | 0.131 |
| NO | 495(25.37) | 333(24.40) | 162(27.65) |  |
| YES | 1456(74.63) | 1032(75.60) | 424(72.35) |  |
| Nitrates,n(%) |  |  |  | 0.605 |
| NO | 1598(81.91) | 1114(81.61) | 484(82.59) |  |
| YES | 353(18.09) | 251(18.39) | 102(17.41) |  |
| β-blockers,n(%) |  |  |  | 0.191 |
| NO | 1263(64.74) | 871(63.81) | 392(66.89) |  |
| YES | 688(35.26) | 494(36.19) | 194(33.11) |  |

### Note: Continuous variables are presented as median (IQR) due to non-normal distribution (Shapiro–Wilk test). Categorical variables are shown as n (%). Abbreviations: NYHA (New York Heart Association), PCI (Percutaneous Coronary Intervention), DBP (Diastolic Blood Pressure), SBP (Systolic Blood Pressure), HR (Heart Rate, beats per minute), BMI (Body Mass Index), WBC (White Blood Cell Count), PLT (Platelet Count), ALT (Alanine Aminotransferase), AST (Aspartate Aminotransferase), FBG (Fasting Blood Glucose), TyG (Triglyceride Glucose Index), HDL-C (High-Density Lipoprotein Cholesterol), LDL-C (Low-Density Lipoprotein Cholesterol), TSH (Thyroid Stimulating Hormone), TT3 (Triiodothyronine), TT4 (Thyroxine), LVEF (Left Ventricular Ejection Fraction).

# Supplementary Table 2 **RCS Curve Knots for Features Selected by Boruta in ACS Patients Who Underwent PCI**

| Characteristic | RCS curve knots |
| --- | --- |
| WBC | 7.03 |
| TyG | 8.95 |
| Uric Acid | 347.8 |
| LDL-C | 2.35 |
| TSH | 2.1 |
| Total Cholesterol | 3.67 |
| LVEF | 61.9 |

**Supplementary Table 3 Brier Scores of Machine Learning Models for Depression Risk Prediction in ACS Patients**

| Model | Brier Score (Train) | Brier Score (Test) |
| --- | --- | --- |
| XGBoost | 0.1312 (0.1208–0.1419) | 0.1337 (0.1163–0.1504) |
| SVM | 0.1587 (0.1480–0.1704) | 0.1424 (0.1263–0.1603) |
| NBM | 0.1639 (0.1515–0.1781) | 0.1661 (0.1472–0.1843) |
| LR | 0.1471 (0.1354–0.1594) | 0.1390 (0.1233–0.1584) |
| LGBM | 0.1184 (0.1074–0.1285) | 0.1503 (0.1329–0.1715) |
| DT | 0.1385 (0.1265–0.1522) | 0.1518 (0.1334–0.1748) |


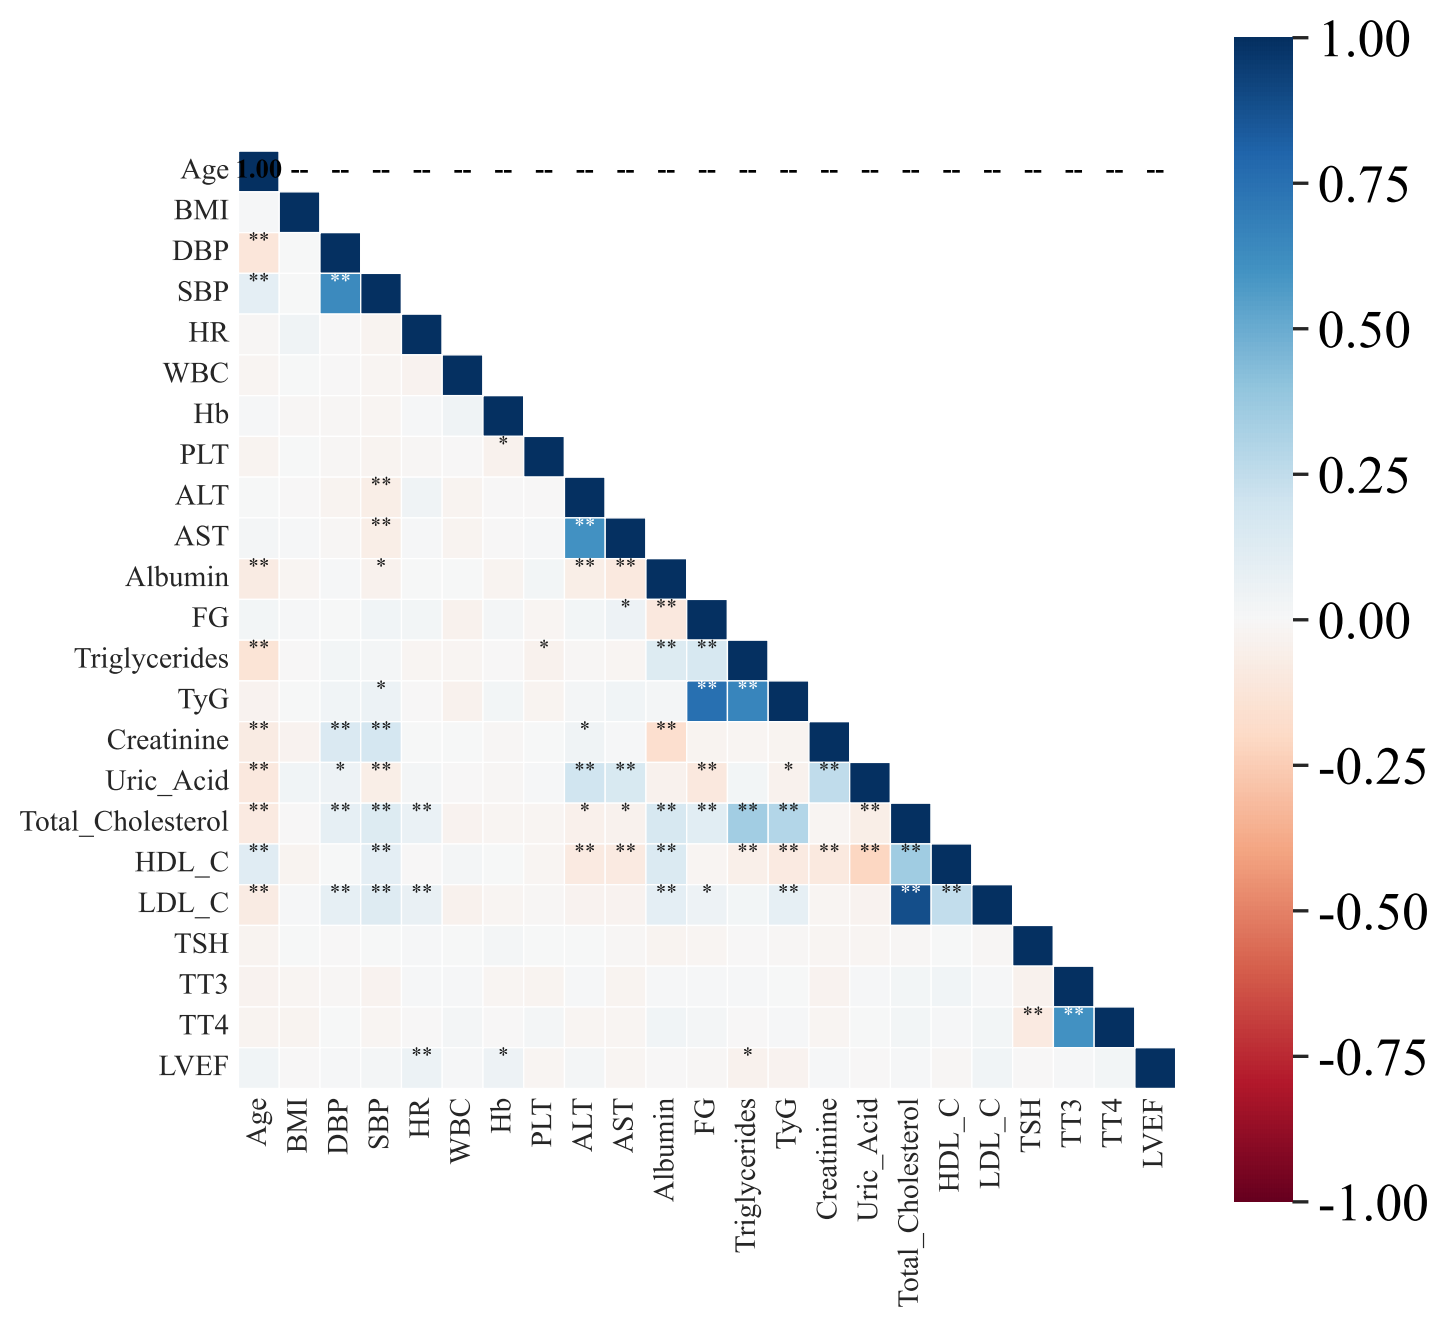


## **Supplementary Figure 1** Correlation Matrix of Clinical Features

The figure shows the correlation matrix of various clinical features, with correlation coefficients represented by color intensity. Positive correlations are shown in blue, while negative correlations are in red. Statistically significant correlations (p < 0.05) are marked with asterisks.

**
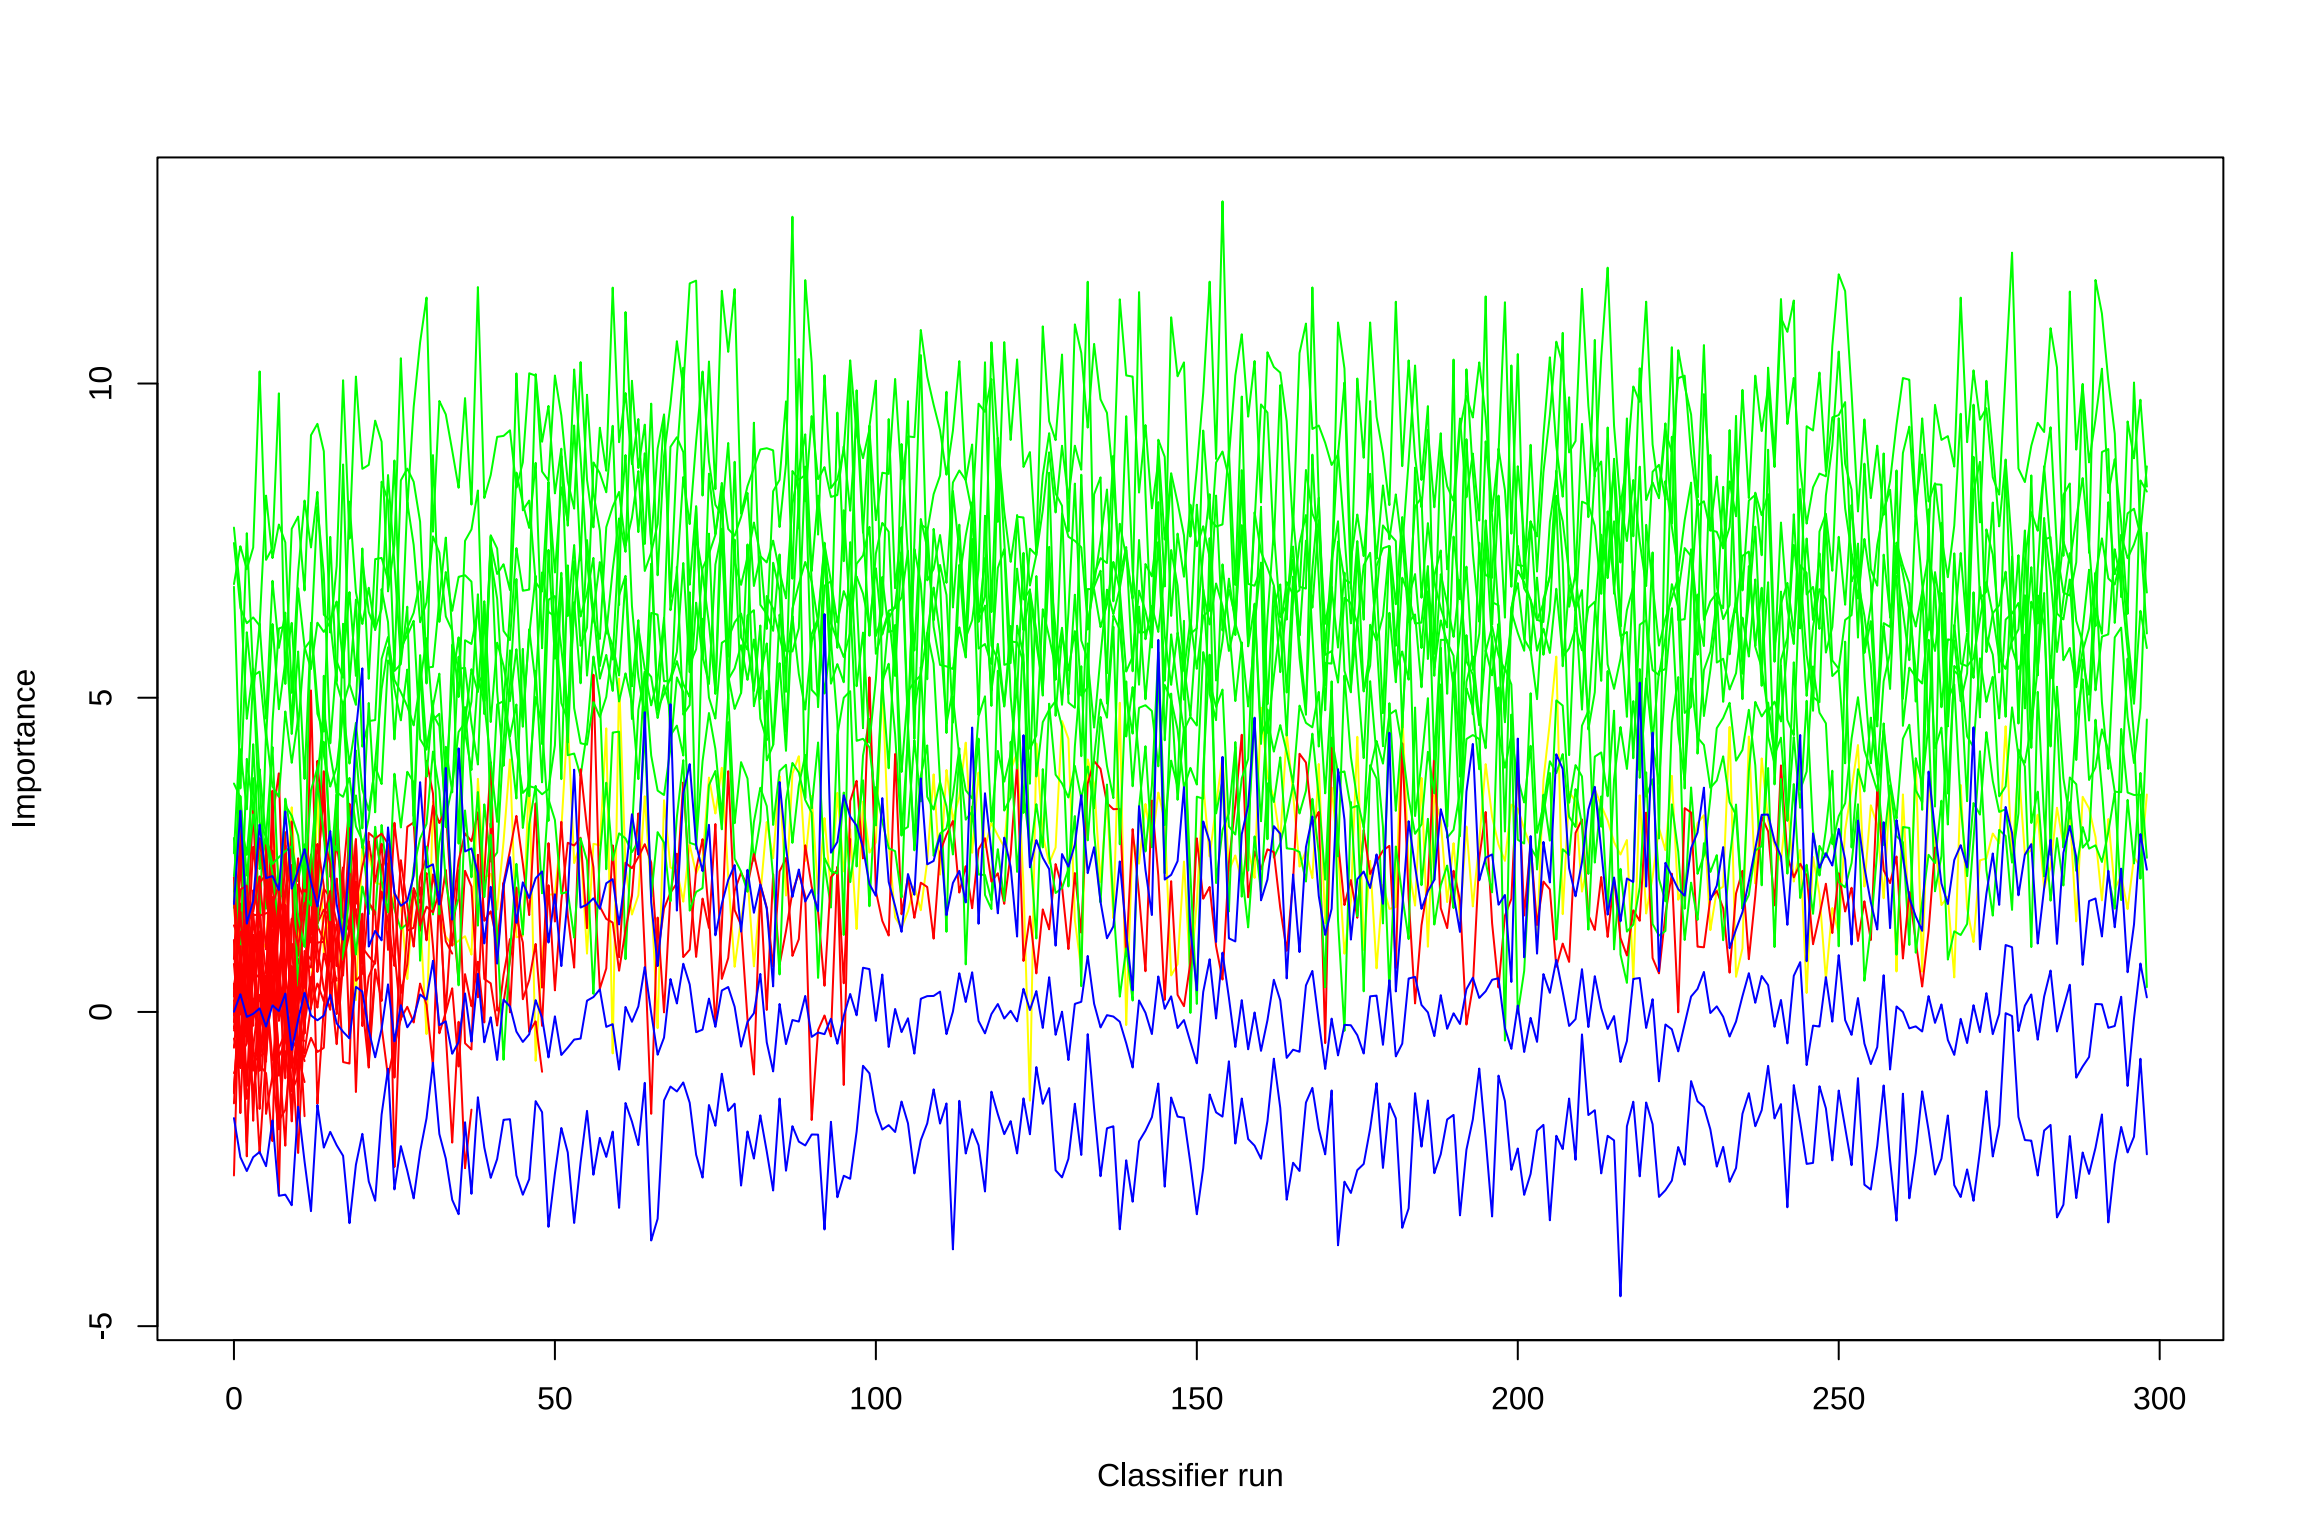
**

**Supplementary Figure 2 Variation of Feature Importance Across 300 Boruta Iterations**

Each line represents the importance of a different feature, with color-coding indicating different features. The x-axis represents the iteration number, and the y-axis shows the importance values, ranging from negative to positive. This demonstrates how the importance of different features fluctuates over multiple runs of the Boruta algorithm.


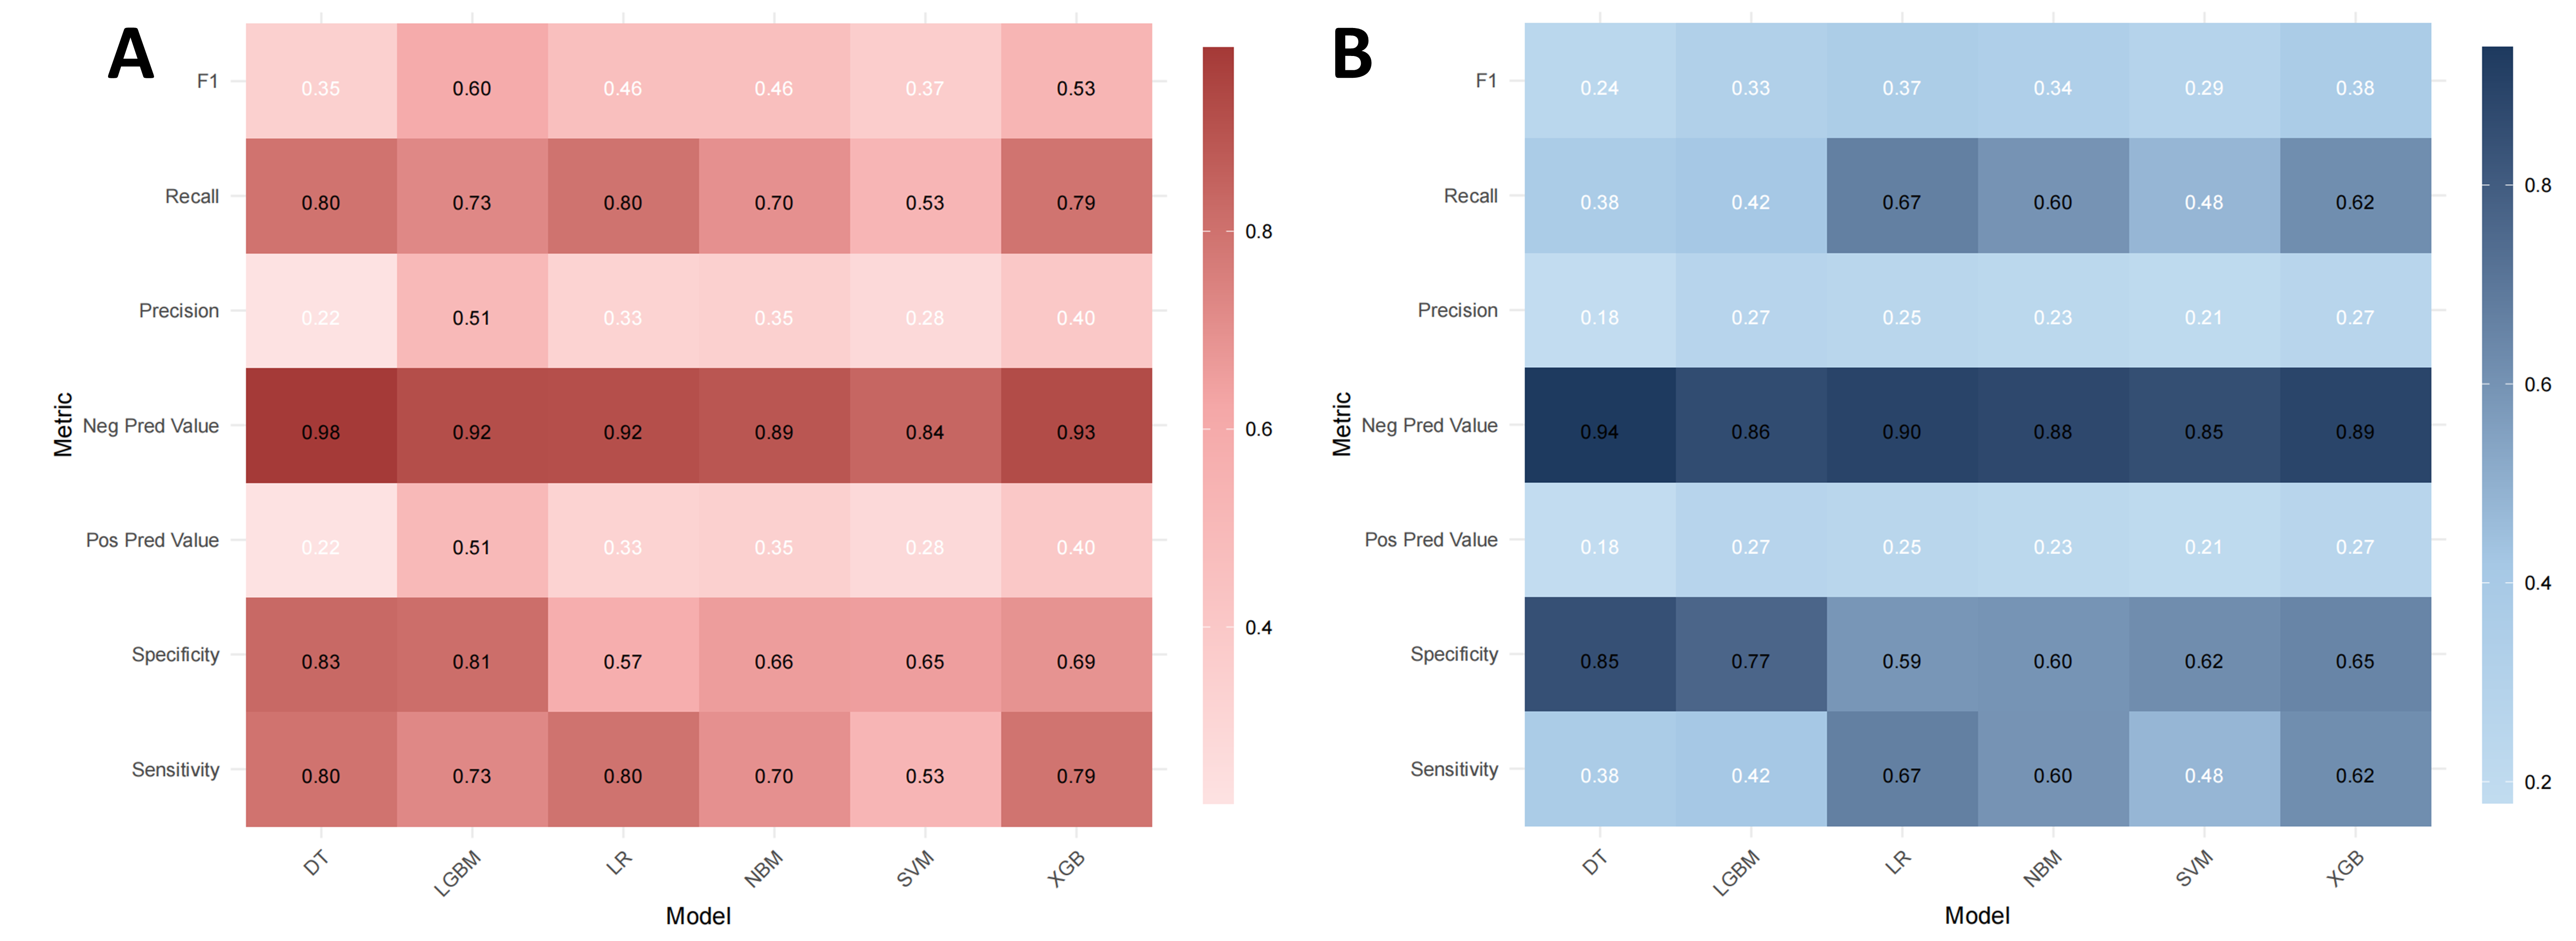


## **Supplementary Figure 3 Performance Metrics Heatmap for Six Models**

(A) Heatmap of performance metrics for different machine learning models on the training set, including F1 score, Recall, Precision, Negative Predictive Value (Neg Pred Value), Positive Predictive Value (Pos Pred Value), Specificity, and Sensitivity.(B) Heatmap of performance metrics for different machine learning models on the validation set, with the same metrics as in (A). The color intensity represents the value of each metric, with darker colors indicating higher values. Models shown include DT (Decision Tree), LGBM (Light Gradient Boosting Machine), LR (Logistic Regression), NBM (Naive Bayes Model), SVM (Support Vector Machine), and XGB (Extreme Gradient Boosting).


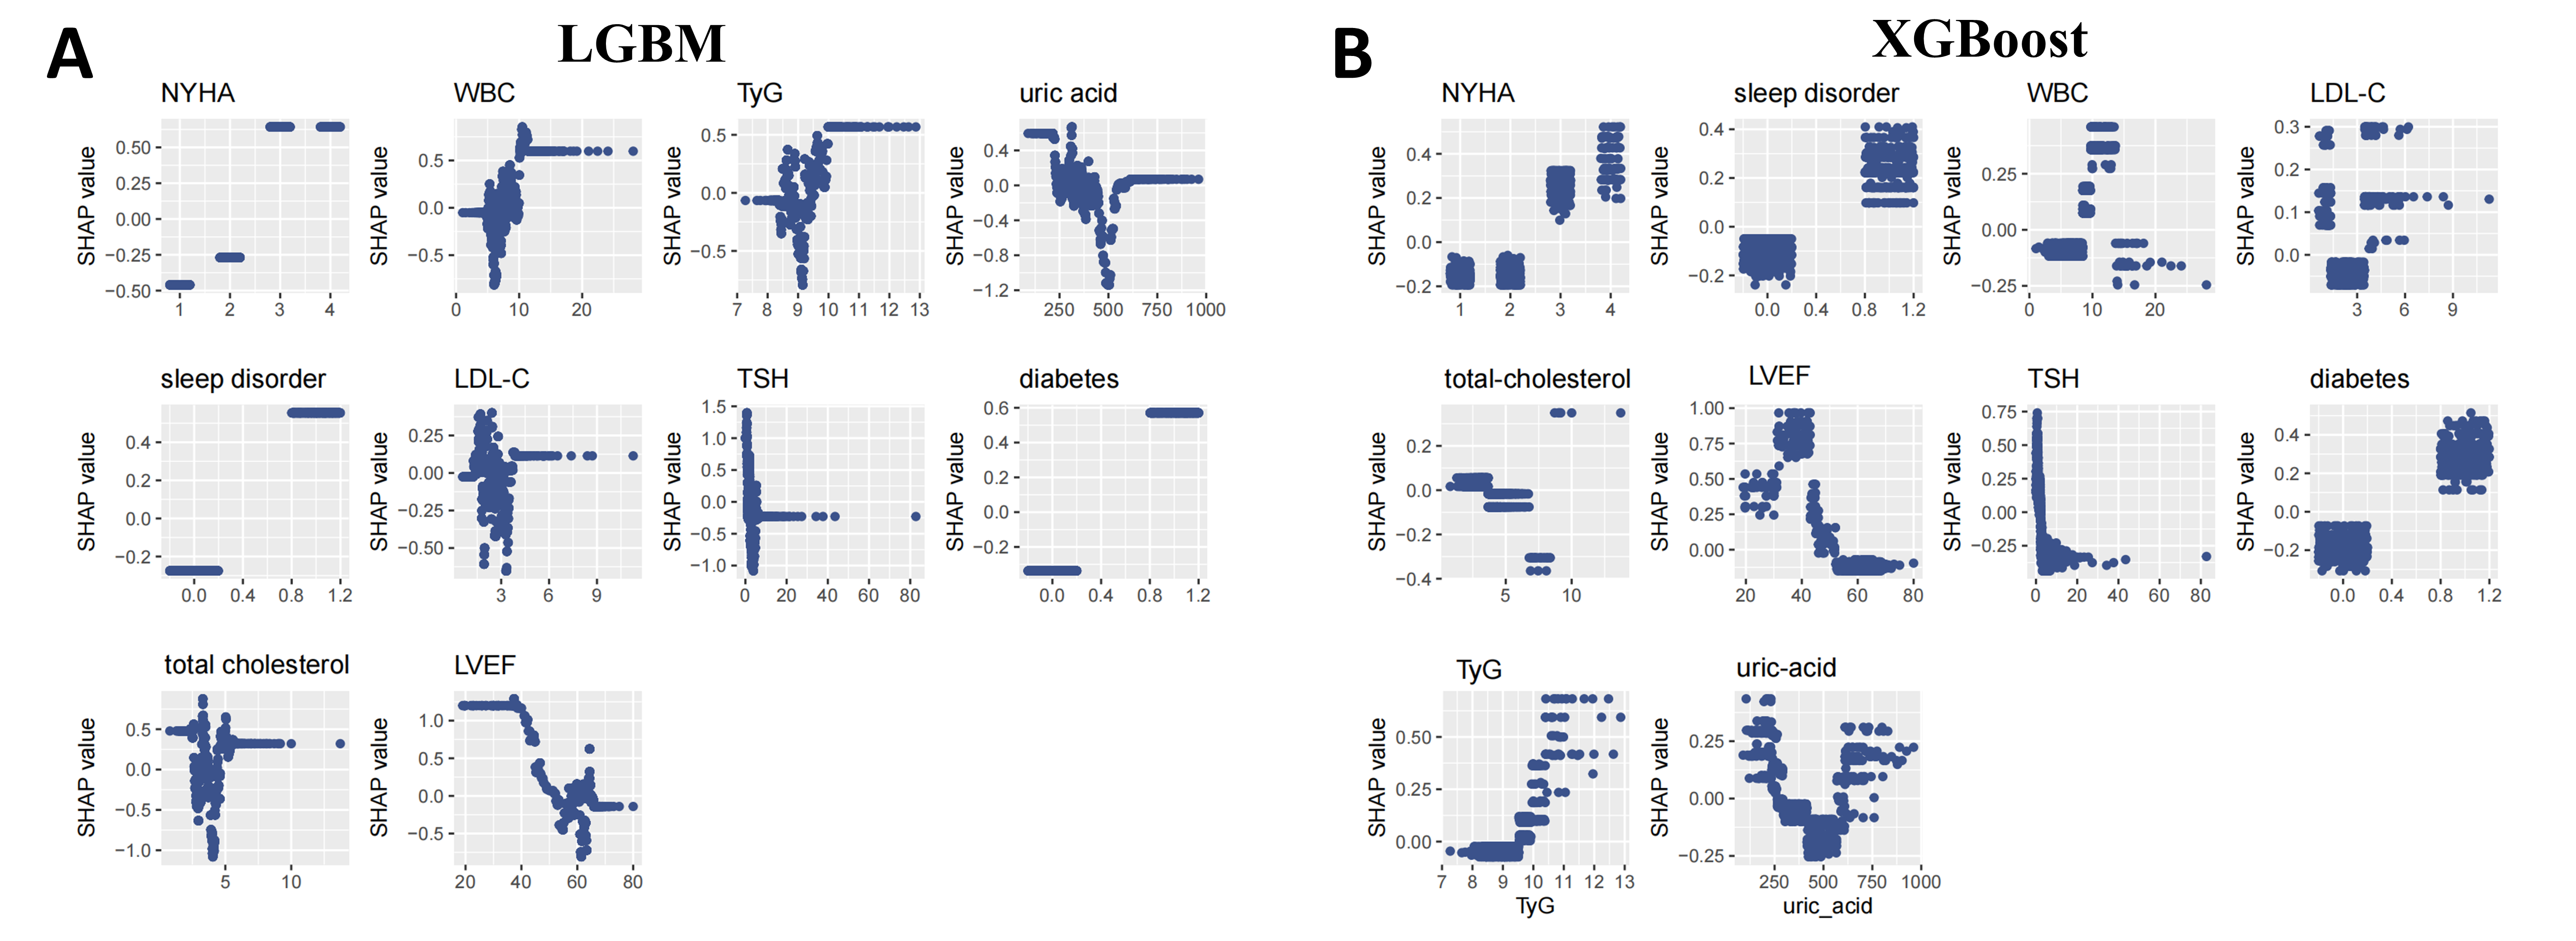


## **Supplementary Figure 4 SHAP Dependence Plots for LGBM and XGBoost Models**

(A) SHAP dependence plots for the LGBM model, illustrating how SHAP values (y-axis) vary with feature values (x-axis) for predictors such as NYHA (New York Heart Association classification), WBC (White Blood Cell count), TyG (Triglyceride Glucose index), uric acid, sleep disorder, LDL-C (Low-Density Lipoprotein Cholesterol), TSH (Thyroid Stimulating Hormone), diabetes, total cholesterol, and LVEF (Left Ventricular Ejection Fraction). The color gradient indicates the interaction of each feature with others, where darker points represent higher feature values.(B) SHAP dependence plots for the XGBoost model, showing similar relationships for the same set of features. Both models demonstrate non-linear effects and thresholds, with slight variations in the feature-specific contributions to depression risk predictions.
